# Supplementary material for: Mercury Exposure and Its Health Effects in Workers in the Artisanal and Small-Scale Gold Mining (ASGM) Sector—A Systematic Review
Source: MDPI journal article supplement (doi:10.3390/ijerph19042081), 2022-02-13
Supplement: s1 [file s1]

## Supplemental Table S1

### Bias assessment

|                                                                                                                |                                    |
|----------------------------------------------------------------------------------------------------------------|------------------------------------|
| Study:                                                                                                         |                                    |
| Grade of evidence                                                                                              |                                    |
| <b>Internal validity – bias<sup>1</sup></b>                                                                    |                                    |
| Are participants blinded to their intervention?                                                                | n.a. (not applicable) <sup>2</sup> |
| Are staff personnel measuring the results blinded?                                                             |                                    |
| Is there any hint for data dredging?                                                                           |                                    |
| Is the length of follow-up equal between the groups?                                                           | n.a. (not applicable) <sup>2</sup> |
| Are the statistical methods adequate?                                                                          |                                    |
| Is the compliance with interventions reliable?                                                                 | n.a. (not applicable) <sup>2</sup> |
| Are the main outcome measures valid and reliable?                                                              |                                    |
| <b>Internal validity – confounder<sup>1</sup></b>                                                              |                                    |
| Is each group recruited from the same population?                                                              |                                    |
| Is each group in recruited over the same time?                                                                 |                                    |
| Are participants randomized to groups ( <b>random sequence generation</b> )?                                   | n.a. (not applicable) <sup>2</sup> |
| Is the randomization concealed for participants and staff ( <b>allocation concealment</b> )?                   | n.a. (not applicable) <sup>2</sup> |
| Is there adequate adjustment for confounders?                                                                  |                                    |
| Are losses of follow-up mentioned?                                                                             | n.a. (not applicable) <sup>2</sup> |
| <b>Performance bias<sup>3</sup></b>                                                                            |                                    |
| Is there evidence for a different treatment of the groups? Are participants and personnel blinded (see above)? |                                    |
| <b>Detection bias<sup>3</sup></b>                                                                              |                                    |
| Is there evidence for a <b>recall bias</b> of the participants?                                                |                                    |
| Is there evidence for an <b>information bias</b> ?                                                             |                                    |
| Is the outcome assessment blinded?                                                                             |                                    |
| <b>Attrition bias<sup>3</sup></b>                                                                              |                                    |
| Is there evidence for incomplete data?                                                                         |                                    |
| <b>Reporting bias<sup>3</sup></b>                                                                              |                                    |
| Is there evidence for selective reporting of significant results?                                              |                                    |
| <b>Other bias<sup>3</sup>:</b>                                                                                 |                                    |

<sup>1</sup> adopted from question 14-26 of:: Downs SH, Black N. The feasibility of creating a checklist for the assessment of the methodological quality both of randomised and non-randomised studies of health care interventions.. Journal of Epidemiology & Community Health 1998;52:377-384.

<sup>2</sup> The question's design for interventional studies does not fit to the given context of expositional studies: the rating n.a. (not applicable) is used and the question was not taken into account for the evaluation

<sup>3</sup> adopted and modified from: Higgins JPT, Altman DG, Sterne JAC (editors). Chapter 8: Assessing risk of bias in included studies. In: Higgins JPT, Green S (editors). *Cochrane Handbook for Systematic Reviews of Interventions* Version 5.1.0 (updated March 2011). The Cochrane Collaboration, 2011. Available from [www.handbook.cochrane.org](http://www.handbook.cochrane.org).
