# Supplementary material for: Mercury Exposure and Its Health Effects in Workers in the Artisanal and Small-Scale Gold Mining (ASGM) Sector—A Systematic Review
Source: MDPI journal article supplement (doi:10.3390/ijerph19042081), 2022-02-13
Supplement: s1 [file s1]

**Supplemental Table S2**  
**Overall risk of bias**

| Study                           | Study design               | Overall risk of bias |
|---------------------------------|----------------------------|----------------------|
| Afrifa et al. [2017]            | Cross-sectional study (XS) | low risk             |
| Afrifa et al. [2018]            | Cross-sectional study (XS) | high risk            |
| Rajaei et al. [2015]            | Cross-sectional study (XS) | high risk            |
| Mensah et al. [2016]            | Cross-sectional study (XS) | high risk            |
| Bose-O'Reilly et al. [2010a]    | Cross-sectional study (XS) | low risk             |
| Harada et al. [1999]            | Cross-sectional study (XS) | high risk            |
| Bose-O'Reilly et al. [2008]     | Cross-sectional study (XS) | low risk             |
| Steckling et al. [2014]         | Cross-sectional study (XS) | high risk            |
| Tayrab [2017]                   | Cross-sectional study (XS) | high risk            |
| Tomicic et al. [2011]           | Cross-sectional study (XS) | high risk            |
| Wanyana et al. [2020]           | Cross-sectional study (XS) | high risk            |
| Bose-O'Reilly et al. [2010b]    | Cross-sectional study (XS) | low risk             |
| Ekawanti and Krisnayanti [2015] | Cross-sectional study (XS) | high risk            |
| Khan et al. [2012]              | Cross-sectional study (XS) | high risk            |
| Riaz et al. [2016]              | Cross-sectional study (XS) | high risk            |
| Lacerda et al. [2020]           | Cross-sectional study (XS) | high risk            |
| Branches et al. [1993]          | Case series (IV)           | high risk            |
| Harari et al. [2012]            | Cross-sectional study (XS) | high risk            |
| Schutzmeier et al. [2016]       | Cross-sectional study (XS) | high risk            |
